# Supplementary material
Source: PubMed Central journal article supplement (PMC5953201)
Supplement: NIHMS964670-supplement-Supplement.pdf [file NIHMS964670-supplement-Supplement.pdf]

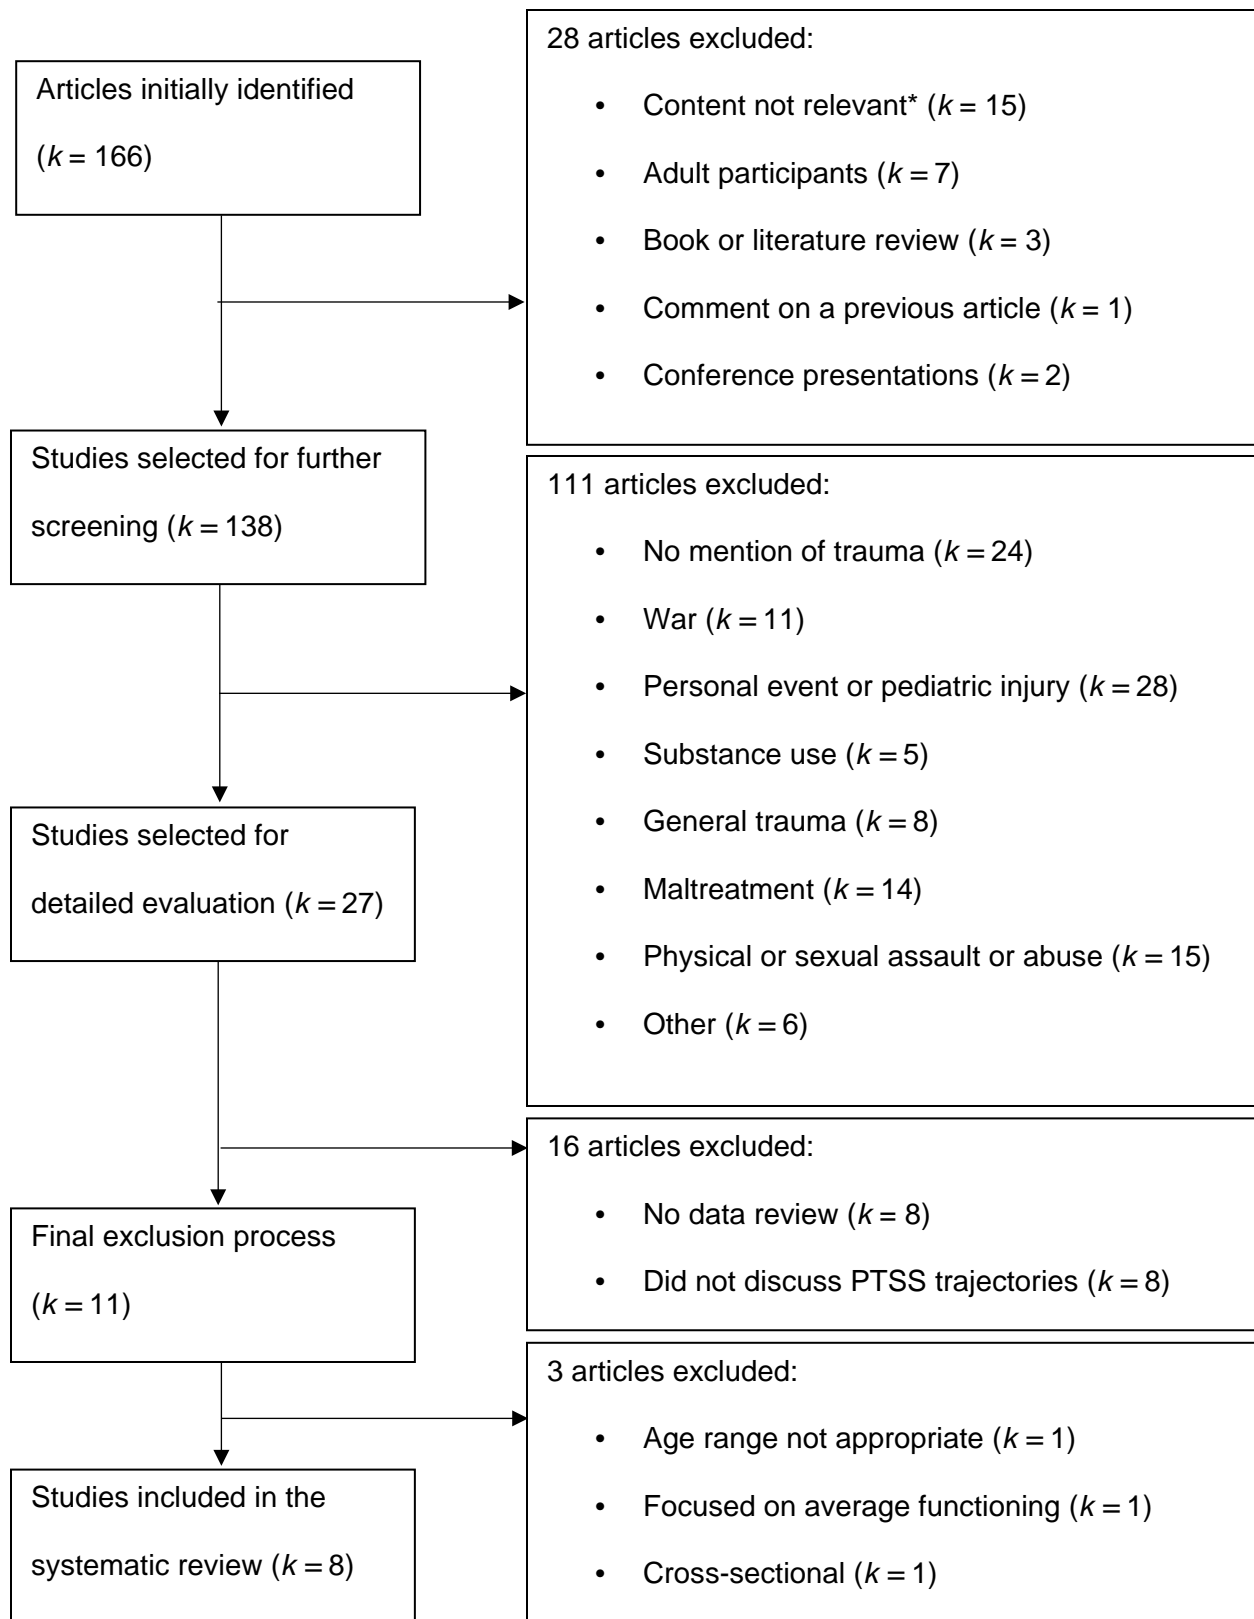

*Note.* PTSS = Posttraumatic Stress Symptoms; *k* = number of articles; \*Studies excluded here focused on biological or genetic factors, clinical suggestions, randomized clinical trials or case-control trials, or trajectories of substance use, cognitive development, behavior, or physical aggression.

**Supplemental Figure 1.** Flow chart of candidate articles.

Supplemental Table 1

*Summary of Review Article Model Details*

| Study                       | Underlying Model<br>Assumptions*                                    | Model Robustness                                                                                                                             | Method for Obtaining Samples                                                                                                                                              |
|-----------------------------|---------------------------------------------------------------------|----------------------------------------------------------------------------------------------------------------------------------------------|---------------------------------------------------------------------------------------------------------------------------------------------------------------------------|
| Fan et al. (2015)           | Assumptions for $\chi^2$ analyses<br>are met                        | Adequate sample size, determined<br>data was missing at random, used<br>expectation-maximization algorithm<br>to impute missing data         | Students recruited from grades 7 and 10<br>at a junior HS and senior HS in<br>Dujiangyan, China                                                                           |
| Kronenberg et al.<br>(2010) | ANOVA assumptions and<br>assumptions for post-hoc<br>tests were met | Adequate sample size, conducted<br>several missing data analyses and<br>found attrition was not related to study<br>factors or outcomes      | Part of a larger assessment of children's<br>overall needs after Katrina; St. Bernard<br>Parish School District administered<br>questionnaires to students in grades 4-12 |
| La Greca et al.<br>(2013)   | Assumptions for latent<br>growth mixture modeling<br>were met       | Large sample, full information<br>maximum likelihood, reported<br>multiple fit indices, simultaneous<br>modeling procedure, switched to a 3- | Students in grades 3-5 from elementary<br>schools in Miami-Dade County, FL,<br>directly affected by Hurricane Andrew                                                      |

---

|                         |                                                                                                          |                                                                                                                                                                                                                                                   |                                                                                                                                                                                   |
|-------------------------|----------------------------------------------------------------------------------------------------------|---------------------------------------------------------------------------------------------------------------------------------------------------------------------------------------------------------------------------------------------------|-----------------------------------------------------------------------------------------------------------------------------------------------------------------------------------|
|                         |                                                                                                          | trajectoy model after 4-trajectory model indicated small trajectory sizes and instability                                                                                                                                                         |                                                                                                                                                                                   |
| Liu et al. (2011)       | Assumptions for $\chi^2$ analyses are met; however, no $\chi^2$ statistics are reported, only $p$ values | Adequate sample size, subscales of the TSCC-A were internally consistent                                                                                                                                                                          | Sampling was conducted in the largest camp elementary school in Beichuan County, China; students were from Qushan Town School that had been destroyed; participants in grades 3-5 |
| McDermott et al. (2014) | Assumptions for $\chi^2$ analyses, logistic regression, and multivariate analyses are met                | Used estimation maximization to impute missing data, authors note small sample size as a limitation to their ability to obtain robust estimates, used robust standard errors to adjust for possible inflation due to clustering of data by school | All children (grades 4-12) attending Catholic Education schools in the Queensland Government-designated disaster area were included in initial sample                             |
| Osofsky et al. (2015)   | Assumptions are met for cluster analyses and                                                             | Large sample size, missing data analyses were performed, missing data imputed using multiple imputation,                                                                                                                                          | Students in pre-kindergarten-12 <sup>th</sup> grade in target schools in Louisiana were included in initial sample as part of a                                                   |

---

---

|                          |                                                                                               |                                                                                                                                                                                                                                      |                                                                                                                                                                                                                                  |
|--------------------------|-----------------------------------------------------------------------------------------------|--------------------------------------------------------------------------------------------------------------------------------------------------------------------------------------------------------------------------------------|----------------------------------------------------------------------------------------------------------------------------------------------------------------------------------------------------------------------------------|
|                          | hierarchical linear modeling analyses                                                         | trajectories found in cluster analysis were corroborated using hierarchical linear modeling                                                                                                                                          | school-initiated screening and intervention project                                                                                                                                                                              |
| Self-Brown et al. (2013) | Assumptions for latent class growth analyses are met                                          | Adequate sample size, used a stepwise process for determining categories then implementing effects of risk and protective factors, assessed trajectories with respect to linear and quadratic growth, analyzed missing data coverage | Children (grades 4-12) and their parents were recruited as part of a multi-wave longitudinal study on the impact of Hurricane Katrina; participants were living in New Orleans and surrounding area when hurricane made landfall |
| Weems & Graham (2014)    | Assumptions for Wilcoxon signed rank tests, cluster analyses, and subsequent analyses are met | Compared participants with complete and incomplete assessment time points with respect to participant characteristics, used listwise deletion, small sample size                                                                     | Children (grades 4-8) attending school in a specific New Orleans neighborhood and participating in a longitudinal study conducted after Hurricane Katrina were included in initial sample                                        |

---

*Note.* ANOVA = Analysis of variance; HS = High school; TSCC-A = Traumatic Symptom Checklist for Children-Alternate Version;

\*Based on text of individual articles.

## Supplemental Appendix A: Additional Searches for Relevant Articles

### Additional Search Strategy 1.

The following child and trauma journals were searched using the same search terms as the primary search: 1) trajector\*, 2) posttraumatic stress, PTSD, depress\*, or anxiety, 3) child\* or adolescent, and 4) trauma, traumatic, incident, or disaster.

- American Journal of Psychiatry
- Applied Developmental Science
- Child Development
- Developmental Psychology
- European Child and Adolescent Psychiatry
- Journal of Abnormal Child Psychology
- Journal of Adolescent Health
- Journal of Affective Disorders
- Journal of Child & Adolescent Trauma
- Journal of Child Psychology and Psychiatry
- Journal of Early Adolescence
- Journal of Pediatric Psychology
- Journal of Traumatic Stress
- Journal of Youth & Adolescence

### Additional Search Strategy 2.

Individuals were identified as content-area experts based on co-authorship on multiple articles identified during the first round of the primary search; their names were searched along with the keyword “trajector\*.”

- G.A. Bonanno
- F. Fan
- D. Finkelhor
- N. Kassam-Adams
- J. Kenardy
- A. La Greca
- X. Liu
- S.R. Lowe
- D.S. Nagin
- C.S. Martin
- A.S. Masten
- H.J. Osofsky
- J.D. Osofsky
- B. Pfefferbaum
- C. Weems

### Additional Search Strategy 3.

The reference lists of the eight studies selected for inclusion in this review were manually searched for additional relevant articles.
